# Supplementary material
Source: PubMed Central journal article supplement (PMC5439333)
Supplement: NIHMS856425-supplement-MIWL_estimation.pdf [file NIHMS856425-supplement-MIWL_estimation.pdf]

% MATLAB file MIWLE.m %

function [theta,v,err,F0,Ohat,H0]=MIWLE(SS,df,theta0,v0,funn,vfr,pr,bd,thrs,btol,maxiter,varargin)

% Maximum Inverse Wishart Likelihood with bias adjustment  
% The inverse of sample size is a parameter  
% A two stage method is used.  
% Code last updated Dec 2013.

% Electronic Supplementary Material to  
% QUANTIFYING ADVENTITIOUS ERROR IN A COVARIANCE STRUCTURE AS A RANDOM EFFECT  
% Psychometrika, 80(3), 619-624  
% by Hao Wu (Boston College, hao.wu.5@bc.edu) and Michael W. Browne (The Ohio State University)

%%%%%%%% List of Input Arguments %%%%%%%%%%%%%%%  
% df is the degrees of freedom.  
% For unadjusted discrepancy function, use df=p(p+1)/2.  
% SS is the input covariance matrix.  
% theta0 is the initial value of structure parameters in the model  
% v0 is the initial value of v=1/m  
% fun is a function handle of the Covariance structure  
% of the form [O,err,R,dOdx,iRdOdx]=fun(theta,...)  
% input and output arguments are  
% theta: a row vector of parameters  
% O: the covariance structure  
% [R,err]=chol(O);  
% dOdx: the derivative of O, a p^2 by q matrix  
% iRdOdx=(R'\otimes R')\dOdx.  
% vfree denotes whether m is fixed or not:  
% 0 means 1/m is treated as fixed at v0;  
% else means it is not fixed.  
% pr prints iteration details:  
% 0: none;  
% 1: only F, Res.Cos, cond.#.H, NPB and NEC;  
% 2: only parameter values;  
% 3: both  
% bd is a matrix of length(theta) by 2,  
% giving boundary conditions for parameters

```

% thrs is the stopping threshold
% btol is the boundary threshold matrix.
% It can be input as a scalar, a column vector or a 2-columned matrix.
% maxiter is the maximum iterations allowed.
% varargin passes arguments to fun, the function handle

```

```

%%%%%%%% List of Output Arguments %%%%%%%%%%
% theta is the parameter estimate
% v is the estimate of 1/m
% err>0 means nonconvergence in either of the two stages
% F0 is the Inverted Wishart discrepancy function value
% Ohat is the implied covariance matrix
% H0 is the Hessian of the inverted Wishart discrepancy function
% w.r.t the covariance structure parameters

```

```

%%%%%%%% List of Screen Outputs %%%%%%%%%%
% #: iteration number
% F: inverted Wishart discrepancy function value (1st stage)
% inverted Wishart -2 log-likelihood value (2nd stage)
% Res.Cos: residual cosine
% cond.#.H: conditional number of Hessian (unconstrained parameters)
% NPB: number of parameters on boundary
% NEC: number of effective constraints
% parameters: covariance structure parameter values
% v: parameter value of v

```

```

global S p detS CS fun other alpha coef

```

```

S=SS;
fun=funn;
other=varargin;

```

```

if nargin<6, error('Too few arguments.');
```

```
end
s=length(theta0); % number of parameters in the covariance structure.
if nargin<7 || all(pr~=0:3), pr=1;end
if nargin<8 || isempty(bd), bd=kron([-Inf,Inf],ones(s,1));end
if nargin<9 || isempty(thrs), thrs=.1^7; end

```

```

if nargin<10 || isempty(btol),    btol=.1^8; end
if nargin<11 || isempty(maxiter),    maxiter=50; end

if all(size(btol)==[1,1])
    btol=btol*ones(s,2);
elseif size(btol,2)==1
    btol=btol*[1,1];
end

if df<0
    error('degrees of freedom must be positive.');
```

end

```

[p,p1]=size(S); % p is the number of manifest variables.
if p~=p1 || ~all(all(isreal(S)))
    error('The covariance matrix should be real square matrix.');
```

elseif any([s,2]~=size(bd)) || any([s,2]~=size(btol)) || any(size(theta0)~= [1,s])

```

    error('The size of one or more input matrices is wrong.');
```

end

```

bd=[bd(:,1)+btol(:,1),bd(:,2)-btol(:,2)]; % not including v.
theta=theta0';
v=v0;
```

%-----

```

% Initial screening

if any(any(S~=S'))
    display('Covariance matrix not symmetric. Lower half used.');
```

S=tril(S);

```

    S=S+triu(S',1);
end
[CS,err]=chol(S);
if err>0,    error('Covariance matrix not positive definite.');
```

end

```

alpha=2*df/p/(p+1); % The adjustment factor.
detS=prod(diag(CS))^2;
coef=[p*(p+1)/2, p*(2*p^2+3*p-1)/12, (p-1)*p*(p+1)*(p+2)/24, p*(6*p^4+15*p^3-10*p^2-30*p+3)/360];
```

```

if any(v<0) || v*(p-1)>1 || any(theta>bd(:,2)) || any(theta<bd(:,1))
    error('initial value on or out of bounds.');
```

end

```

[~,err]=feval(fun,theta',other{:});
if err~=0
    error('initial value yields non-positive definite covariance');
```

end

```

switch pr
    case 0
    case 1
        display(' #          F          Res.Cos          cond.#.H          NPB NEC');
```

case 2

```

        display(' #          F          parameters');
```

case 3

```

        display(' #          F          Res.Cos          cond.#.H          NPB NEC          parameters');
```

end

  

```

%-----
% iterations
iter=-1;
inc=true(s,1);
crit=Inf;
d=0;
f=Inf;
```

```

while (crit>thrs && f>thrs && iter<=maxiter &&any(inc))
    iter=iter+1;
    theta1=theta+d;
    ubd1=find(theta1>bd(:,2)); % locations of new effective bounds
    lbd1=find(theta1<bd(:,1));
    bd1=[lbd1;ubd1];
    if ~isempty(bd1)
        bds=[bd(lbd1,1);bd(ubd1,2)];
        if pr~=0
            display('back to the boundary.');
```

```

end
[r,ind]=min((bds-theta(bd1))./d(bd1));
d=d*r;
thetal=theta+d;
thetal(bd1(ind))=bds(ind);
end
while 1
[f1,err,g,H]=FgHtheta(thetal,f);
if err~=0 && pr==0
    d=d/2;
    thetal=theta+d;
    continue;
elseif err==0
    display('step halved.')
    d=d/2;
    thetal=theta+d;
    continue;
end
break;
end
theta=thetal;
f=f1;
ubd=(theta==bd(:,2));
lbd=(theta==bd(:,1));
invH=inv(H);
d=-invH*g; % unconstrained search direction
if any(d(ubd)>0) || any(d(lbd)<0) % out of boundary
    lambda=zeros(s,1);
    effbd=~true(s,1);
    effbd(ubd)=true;
    effbd(lbd)=true;
    lambda(effbd)=invH(effbd,effbd)\d(effbd); % would-be lagrange multiplier
    [rmbd,ind]=max((-lambda.*ubd+lambda.*lbd).*effbd); % removable bounds
    while rmbd>0 % some effective bounds can be removed
        effbd(ind)=false; % remove inequality constraints;
        lambda(effbd)=invH(effbd,effbd)\d(effbd); % would-be lagrange multiplier
        [rmbd,ind]=max((-lambda.*ubd+lambda.*lbd).*effbd); % removable bounds
    end
end

```

```

    inc(effbd)=false;
    d(inc)=-H(inc,inc)\g(inc);
    d(~inc)=0;
end
condH=cond(H);
crit=max(g(inc).*g(inc)./diag(H(inc,inc))/f);
switch pr
    case 0
    case 1
        str1=sprintf('%3d',iter);
        str2=sprintf('%0.5e',f);
        str3=sprintf('%0.5e',crit);
        str4=sprintf('%0.5e',condH);
        str5=sprintf('%2d',sum(ubd)+sum(lbd));
        str6=sprintf('%2d',s-sum(inc));
        display([str1,' ',str2,' ',str3,' ',str4,' ',str5,' ',str6]);
    case 2
        str1=sprintf('%3d',iter);
        str2=sprintf('%0.5e',f);
        str7=sprintf('%+13.5e',theta);
        display([str1,' ',str2,' ',str7]);
    case 3
        str1=sprintf('%3d',iter);
        str2=sprintf('%0.5e',f);
        str3=sprintf('%0.5e',crit);
        str4=sprintf('%0.5e',condH);
        str5=sprintf('%2d',sum(ubd)+sum(lbd));
        str6=sprintf('%2d',s-sum(inc));
        str7=sprintf('%+13.5e',theta);
        display([str1,' ',str2,' ',str3,' ',str4,' ',str5,' ',str6,' ',str7]);
end
end
F0=f; % IW discrepancy function value.

%-----
% output of 1st stage and switch to the 2nd stage.
H0=H;
Ohat=feval(fun,theta',other{:});

```

```

if iter>maxiter
    if pr~=0
        display('maximum number of iterations reached without convergence.');
```

| iter | pr | err | v   | theta    | F0  | H0       | Ohat |
|------|----|-----|-----|----------|-----|----------|------|
| 1    | 0  | 1   | NaN | NaN(s,1) | NaN | nan(s,s) | []   |
| 2    | 0  | 0   | v0  |          |     |          |      |

```

    end
    err=1;
    v=NaN;
    theta=NaN(s,1);
    F0=NaN;
    H0=nan(s,s);
    Ohat=[];
    return;
elseif vfr==0
    v=v0;
    err=0;
    return;
end

switch pr
    case 0
        otherwise
            display(' #          F          Res.Cos          H          v');
```

---

```

% iterations
iter=-1;
crit=Inf;
d=0;
f=Inf;
inc=1;
while (crit>thrs && iter<=maxiter && ~isempty(inc))
    iter=iter+1;
    v1=v+d;
    if v1<0.1^7 || v1>1/(p-1)-.1^7
        if pr~=0
            display('back to the boundary.');
```

| iter | pr | err | v1  |
|------|----|-----|-----|
| 1    | 0  | 1   | NaN |
| 2    | 0  | 0   | v0  |
| 3    | 0  | 0   | v1  |

```

        end
        v1=.1^7*(v1<0.1^7)+(1/(p-1)-.1^7)*(v1>1/(p-1)-.1^7);
    end
end
end

```

```

        d=v1-v;
    end
    while 1
        [f1,err,g,H]=FgHv(v1,F0,f);
        if err~=0 && pr==0
            d=d/2;
            v1=v+d;
            continue;
        elseif err~=0
            display('step halved.')
            d=d/2;
            v1=v+d;
            continue;
        end
        break;
    end
    v=v1;
    f=f1;
    if v==0.1^7 && g>=0 || v>=(1/(p-1)-.1^7) && g<=0
        inc=[];
    end
    d=-g/H;
    crit=g^2/H;
    switch pr
        case 0
            otherwise
                str1=sprintf('%3d',iter);
                str2=sprintf('%0.5e',f);
                str3=sprintf('%0.5e',crit);
                str4=sprintf('%0.5e',H);
                str5=sprintf('%0.5e',v);
                display([str1,' ',str2,' ',str3,' ',str4,' ',str5]);
            end
    end
end

%-----
% output
if iter<=maxiter

```



```

    err=0;
else
    if pr~=0

        display('maximum iteration reached without convergence.');
```

end

```

    err=1;
    v=NaN;
end

end % of main function

%-----

function [F,errt,dFdx,d2Fdxdx]=FgHtheta(theta,F0)

global S detS CS p fun other

[O,errt,R]=feval(fun,theta',other{:}); %R'R=0;

if errt~=0
    [F,dFdx,d2Fdxdx]=deal(NaN);
    errt=1;
    return;
end
detO=prod(diag(R))^2;

dif=CS'\(O-S)/CS;
F=max([0,log(detS/detO)+trace(dif)]);

if F>F0
    errt=3;
    [dFdx,d2Fdxdx]=deal(NaN);
    return;
end

%-----
% gradient and Hessian
```

```

if isempty(theta)
    dFdx=[];
    d2Fdxdx=[];
else
    [~,~,R,~,iRdOiR]=feval(fun,theta',other{:}); % a p^2 by s matrix
    A=CS'\R';
    A=A'*A-eye(p);
    dFdx=iRdOiR'*A(:);
    d2Fdxdx=iRdOiR'*iRdOiR;
end
errt=0;

end % end of function FgHtheta

%-----
function [f,errv,dfdvd,d2fdv2]=FgHv(v,F0,f0)

    % f = -2lnL
    % F0 is inverted Wishart discrepancy function value
    % f0 is F value of the last round

global p alpha coef

if v==0 && F0>0
    f=Inf;
elseif v<0
    errv=2;
    [f,dfdvd,d2fdv2]=deal(NaN);
    return;
elseif v==0 && F0==0
    f=-Inf;
elseif (p==1 && v<=0.01)|| (p>1 && (p-1)*v<=.01)
    f=alpha*(coef*[log(v),v,v^2,v^3]'+p*(p-1)/2*log(2*pi)+p*log(4*pi))+F0/v;
else
    i=1:p;
    m=1/v;
    f=alpha*(2*sum(gammaln((m-i+1)/2))-m*p*(log(m/2)-1)+p*(p-1)/2*log(pi))+F0*m;

```

```

end

if f>f0
    errv=3;
    [dfdvd,d2fdv2]=deal (NaN);
    return;
end
%-----
% gradient and Hessian

if v==0
    dfdv=NaN;
    d2fdv2=NaN;
elseif (p==1 && v<=0.01) || (p>1 && (p-1)*v<=.01)
    dfdv=alpha*coef*[1/v,1,2*v,3*v^2]'-F0/v^2;
    d2fdv2=max([1e-8,alpha*coef*[-1/v^2,0,2,6*v]'+2*F0/v^3]);
else
    i=1:p;
    m=1/v;
    dcdm=sum(psi((m-i+1)/2))-p*log(m/2);
    dfdv=-m^2*(alpha*dcdm+F0);
    d2fdv2=max([1e-8,alpha*(m^4*sum(psi(1,(m-i+1)/2))/2-p*m^3+2*m^3*dcdm)+2*F0/v^3]);
end
errv=0;

end

```
